# Supplementary material for: Influence of polyhedral oligomeric silsesquioxanes (POSS) on the luminescence properties of non-conjugated copolymers based on iridium complex and carbazole units
Source: Royal Society of Chemistry journal article supplement (doi:10.1039/c7ra07316j), 2017-01-01
Supplement: c7ra07316j1.pdf [file c7ra07316j1.pdf]

## Supplementary Information

for

### **Influence of polyhedral oligomeric silsesquioxanes (POSS) on the luminescence properties of non-conjugated copolymers based on iridium complex and carbazole units**

Meijuan Lin\*, Caiping Luo, Guang Xing, Longjie Chen and Qidan Ling\*

*Fujian Key Laboratory of Polymer Materials, College of Chemistry and Materials, Fujian Normal University, Fuzhou 350007, China*

*E-mail addresses: [mjlin@fjnu.edu.cn](mailto:mjlin@fjnu.edu.cn) (M. Lin), [qdling@fjnu.edu.cn](mailto:qdling@fjnu.edu.cn) (Q. Ling); [Tel:+86 591 83464353](tel:+8659183464353)*

## Table of Contents

**Fig. S1** GPC chromatograms curves of the copolymers

**Fig. S2** Time-resolved fluorescence decay curves and their lifetimes of the donor PCz for the polymers in  $\text{CH}_2\text{Cl}_2$  at 293 K

**Fig. S3** Time-resolved phosphorescence decay curves of the copolymers in powder at 293 K

**Fig. S4** The CV curves of the copolymers

**Table S1** The electrochemical properties of the copolymers

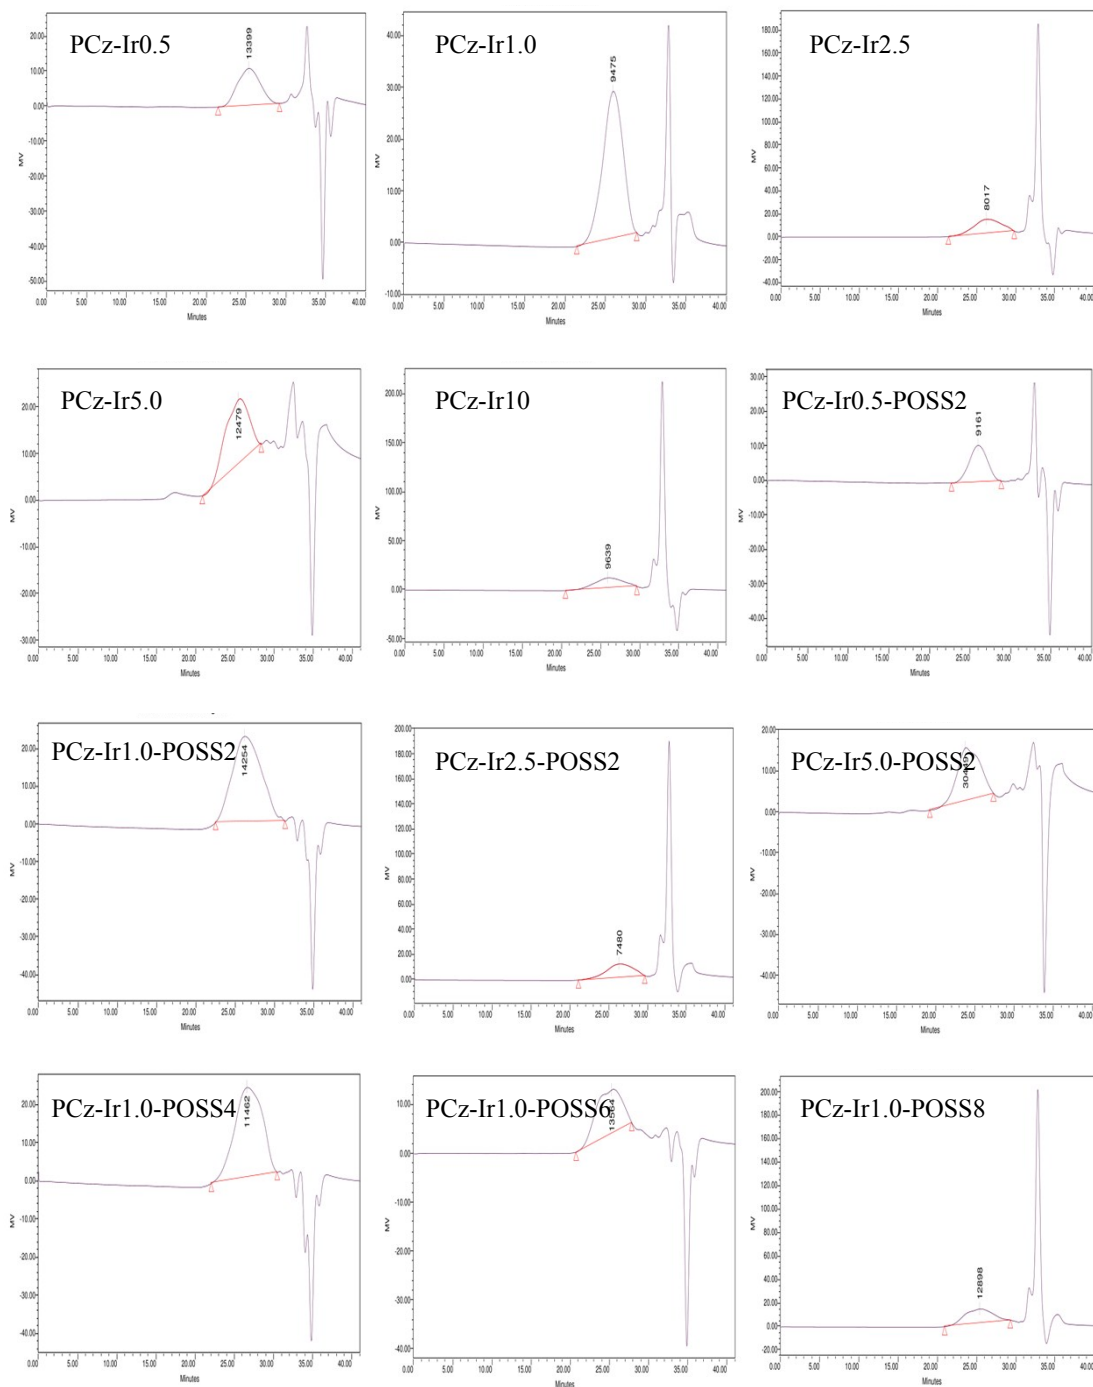

**Fig. S1** GPC chromatograms curves of the copolymers

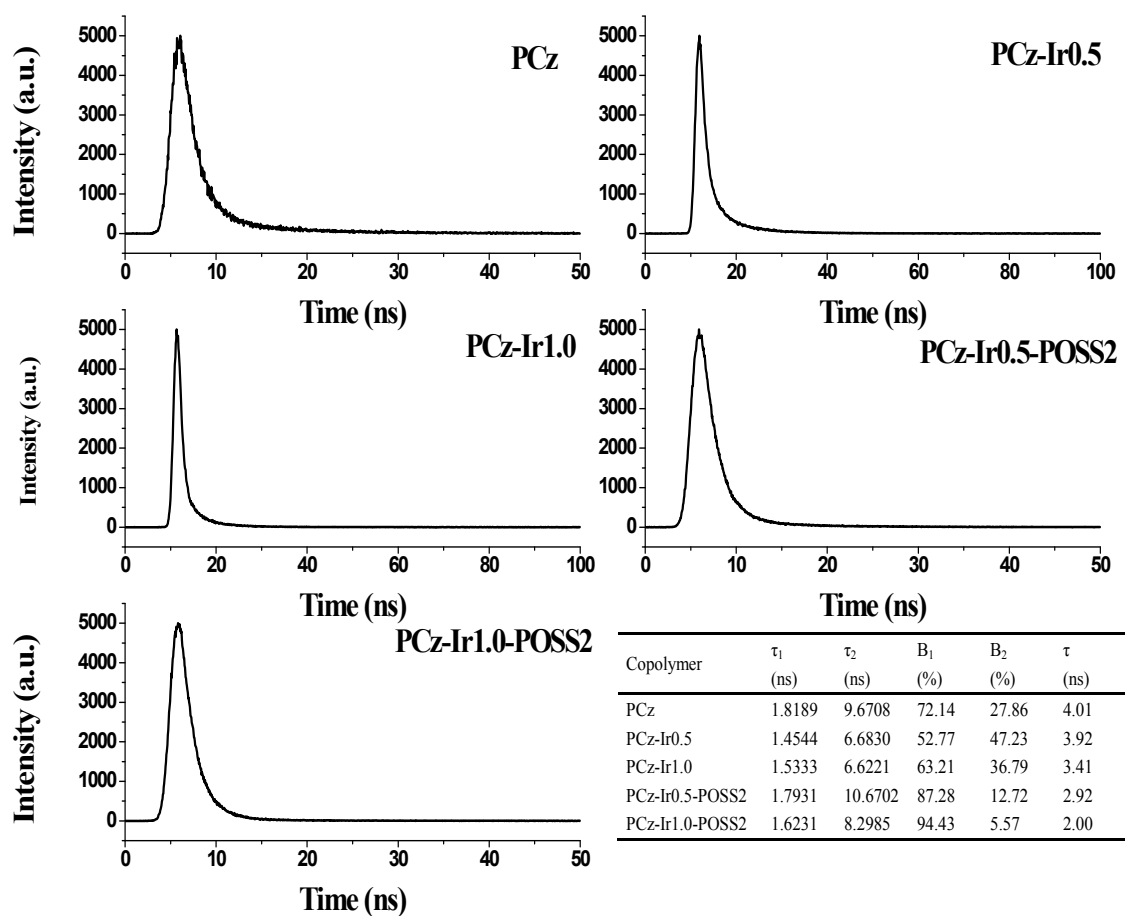

**Fig. S2** Time-resolved fluorescence decay curves and their lifetimes of the donor for the polymers in  $10^{-5}$ M  $\text{CH}_2\text{Cl}_2$  solution measured at 435 nm blue emission at 293 K using 380 nm excitation, which can be well-fitted by bi-exponential function.

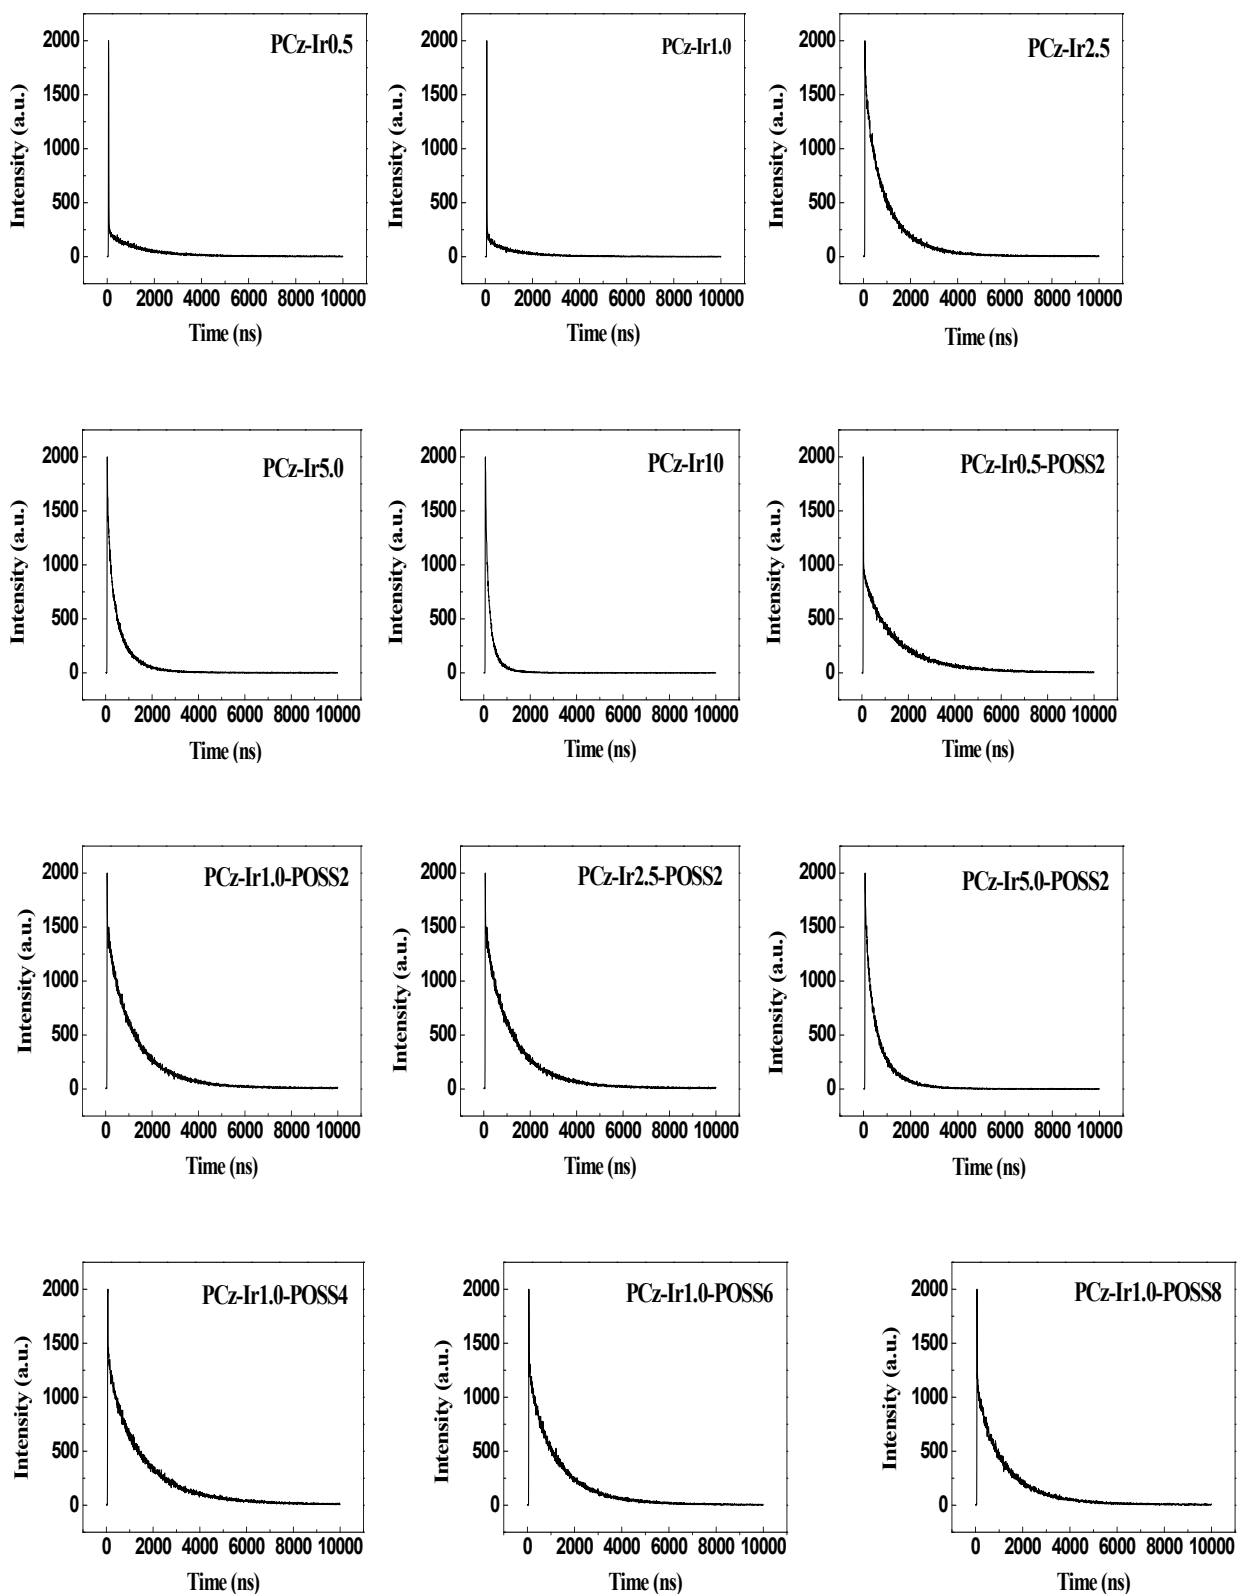

**Fig. S1** Time-resolved phosphorescence decay curves of the copolymers in powder measured at green band around 535 nm at 293 K using an excitation of around 380 nm, which can be well-fitted by bi-exponential function.

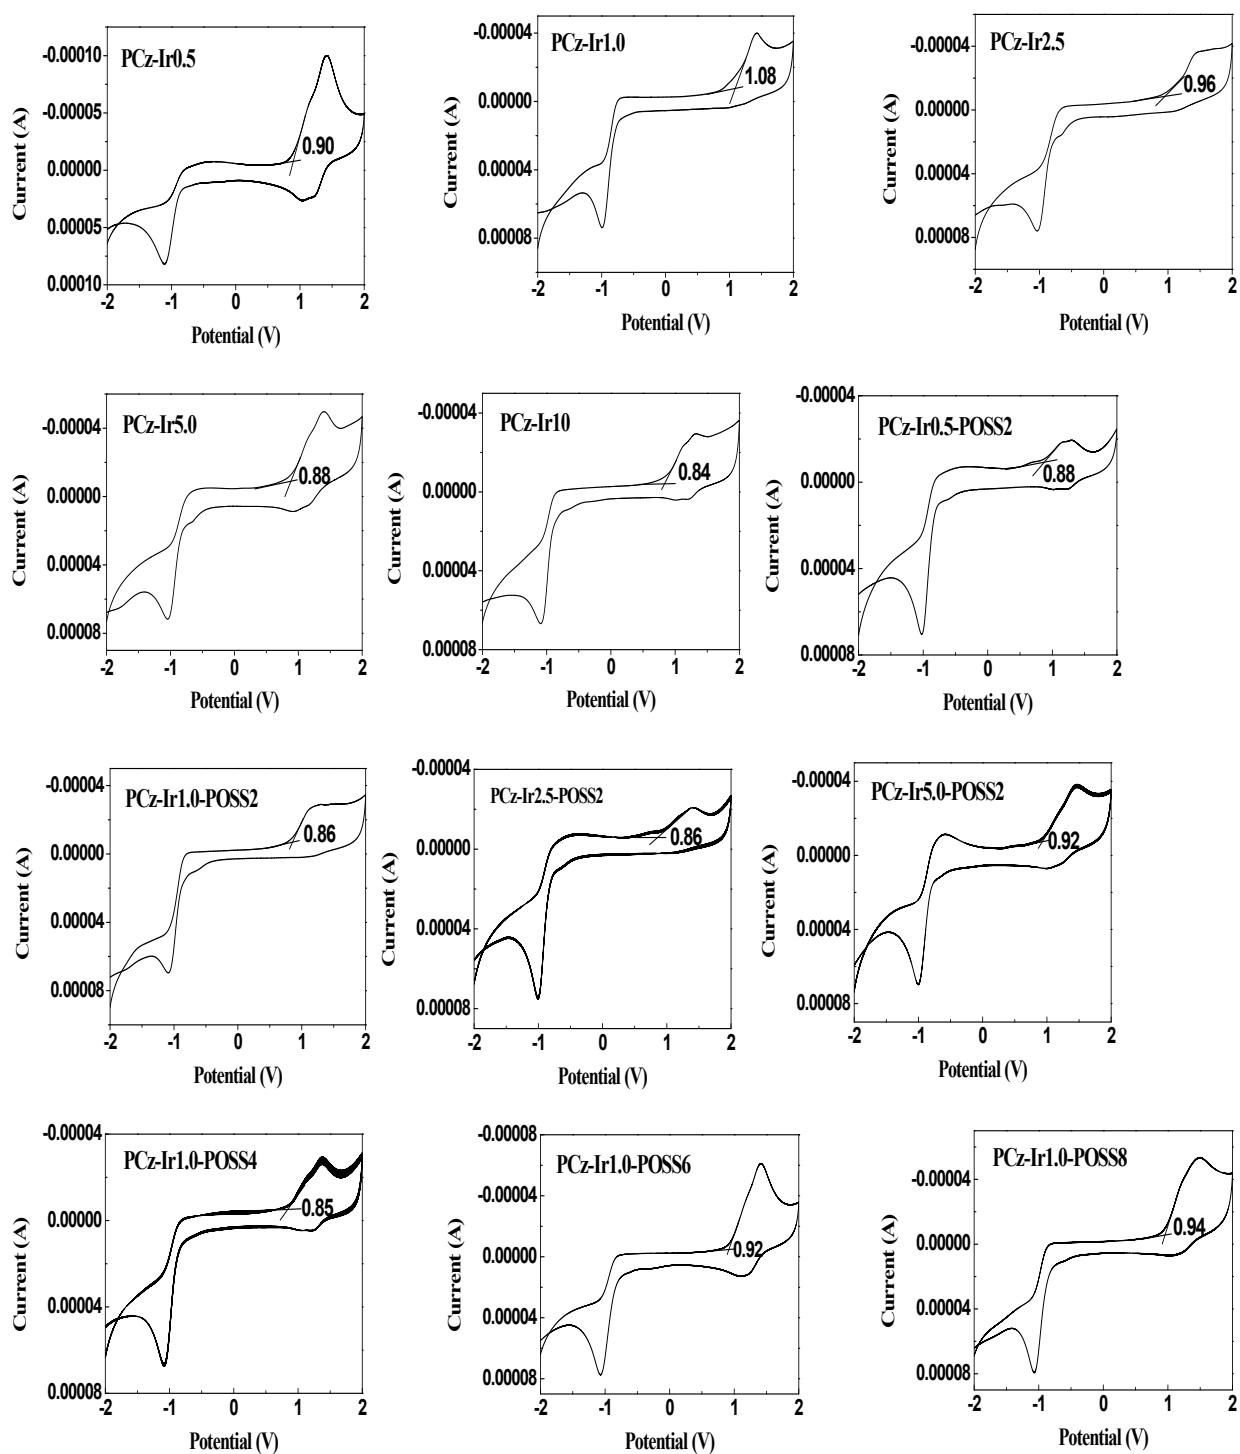

**Fig. S4** The CV curves of the copolymers performed with the three electrodes immersed in 0.1 M tetrabutylammonium tetrafluoroborate ( $\text{Bu}_4\text{NBF}_4$ ) in anhydrous acetonitrile at room temperature under nitrogen gas with a scan rate of 50 mV/s.

**Table S1** The electrochemical properties of the copolymers

| Copolymer       | $E_{\text{onset}}^{\text{ox}}$<br>(V) | HOMO<br>(eV) | LUMO<br>(eV) | $E_g$<br>(eV) |
|-----------------|---------------------------------------|--------------|--------------|---------------|
| PCz-Ir0.5       | 0.90                                  | -5.70        | -2.41        | 3.29          |
| PCz-Ir1.0       | 1.08                                  | -5.88        | -2.58        | 3.30          |
| PCz-Ir2.5       | 0.96                                  | -5.76        | -2.43        | 3.33          |
| PCz-Ir5.0       | 0.88                                  | -5.68        | -2.38        | 3.30          |
| PCz-Ir10        | 0.84                                  | -5.64        | -2.33        | 3.31          |
| PCz-Ir0.5-POSS2 | 0.88                                  | -5.68        | -2.46        | 3.22          |
| PCz-Ir1.0-POSS2 | 0.86                                  | -5.66        | -2.42        | 3.24          |
| PCz-Ir2.5-POSS2 | 0.86                                  | -5.66        | -2.46        | 3.20          |
| PCz-Ir5.0-POSS2 | 0.92                                  | -5.72        | -2.49        | 3.23          |
| PCz-Ir1.0-POSS4 | 0.85                                  | -5.65        | -2.42        | 3.23          |
| PCz-Ir1.0-POSS6 | 0.92                                  | -5.72        | -2.48        | 3.24          |
| PCz-Ir1.0-POSS8 | 0.94                                  | -5.74        | -2.54        | 3.20          |
